# Supplementary material
Source: PubMed Central journal article supplement (PMC5863949)
Supplement: NIHMS76485-supplement-Reporting_Summary.pdf [file NIHMS76485-supplement-Reporting_Summary.pdf]

## Life Sciences Reporting Summary

Nature Research wishes to improve the reproducibility of the work that we publish. This form is intended for publication with all accepted life science papers and provides structure for consistency and transparency in reporting. Every life science submission will use this form; some list items might not apply to an individual manuscript, but all fields must be completed for clarity.

For further information on the points included in this form, see [Reporting Life Sciences Research](#). For further information on Nature Research policies, including our [data availability policy](#), see [Authors & Referees](#) and the [Editorial Policy Checklist](#).

## ▶ Experimental design

## 1. Sample size

Describe how sample size was determined.

N/A  
All experiments were repeated at least 3 times (=biological replicates).

## 2. Data exclusions

Describe any data exclusions.

No data were excluded from analyses

## 3. Replication

Describe whether the experimental findings were reliably reproduced.

All attempts at replication were successful

## 4. Randomization

Describe how samples/organisms/participants were allocated into experimental groups.

N/A

## 5. Blinding

Describe whether the investigators were blinded to group allocation during data collection and/or analysis.

N/A

Note: all studies involving animals and/or human research participants must disclose whether blinding and randomization were used.

## 6. Statistical parameters

For all figures and tables that use statistical methods, confirm that the following items are present in relevant figure legends (or in the Methods section if additional space is needed).

n/a Confirmed

- The exact sample size ( $n$ ) for each experimental group/condition, given as a discrete number and unit of measurement (animals, litters, cultures, etc.)
- A description of how samples were collected, noting whether measurements were taken from distinct samples or whether the same sample was measured repeatedly
- A statement indicating how many times each experiment was replicated
- The statistical test(s) used and whether they are one- or two-sided (note: only common tests should be described solely by name; more complex techniques should be described in the Methods section)
- A description of any assumptions or corrections, such as an adjustment for multiple comparisons
- The test results (e.g.  $P$  values) given as exact values whenever possible and with confidence intervals noted
- A clear description of statistics including central tendency (e.g. median, mean) and variation (e.g. standard deviation, interquartile range)
- Clearly defined error bars

See the web collection on [statistics for biologists](#) for further resources and guidance.

## ► Software

Policy information about [availability of computer code](#)

### 7. Software

Describe the software used to analyze the data in this study.

Mass spectrometry data were analysed using Scaffold 4 Viewer  
No other software was used

For manuscripts utilizing custom algorithms or software that are central to the paper but not yet described in the published literature, software must be made available to editors and reviewers upon request. We strongly encourage code deposition in a community repository (e.g. GitHub). *Nature Methods* [guidance for providing algorithms and software for publication](#) provides further information on this topic.

## ► Materials and reagents

Policy information about [availability of materials](#)

### 8. Materials availability

Indicate whether there are restrictions on availability of unique materials or if these materials are only available for distribution by a for-profit company.

Our Trx trapping construct is distributed by Addgene.  
All other DNA constructs are available from the authors (on the basis of an MTA).

### 9. Antibodies

Describe the antibodies used and how they were validated for use in the system under study (i.e. assay and species).

The complete list of antibodies is provided in the manuscript  
All antibodies were validated by WB and IP by the manufacturer.

### 10. Eukaryotic cell lines

a. State the source of each eukaryotic cell line used.

HAP1 cells were purchased from Horizon Discovery.  
HEK293T cells were purchased from ATCC.

b. Describe the method of cell line authentication used.

The Multiplex human Cell Line Authentication test (MCA) was used to authenticate cell lines as described on [www.multiplexion.de](http://www.multiplexion.de)

c. Report whether the cell lines were tested for mycoplasma contamination.

Cell lines were tested negative for mycoplasma contamination as stated in Material and Methods section

d. If any of the cell lines used are listed in the database of commonly misidentified cell lines maintained by [ICLAC](#), provide a scientific rationale for their use.

The HEK293T cell line was used since it is easy to manipulate.

## ► Animals and human research participants

Policy information about [studies involving animals](#); when reporting animal research, follow the [ARRIVE guidelines](#)

### 11. Description of research animals

Provide details on animals and/or animal-derived materials used in the study.

No animals were used.

Policy information about [studies involving human research participants](#)

### 12. Description of human research participants

Describe the covariate-relevant population characteristics of the human research participants.

The study did not involve human research participants.
